# Supplementary material for: Ring-opening mechanism of epoxides with alcohol and tertiary amines
Source: Royal Society of Chemistry journal article supplement (doi:10.1039/d3py00481c), 2023-01-01
Supplement: d3py00481c1.pdf [file d3py00481c1.pdf]

## Supporting Information for: Ring-opening mechanism of epoxides with alcohol and tertiary amine

Yongzhuang Du<sup>1</sup>, Xiaoqiang Xue<sup>1,2</sup>, Qimin Jiang<sup>1,3</sup>, Wenyan Huang<sup>1,3</sup>, Hongjun Yang<sup>1,3</sup>, Li  
Jiang<sup>1,3</sup>, Bibiao Jiang<sup>1,3\*</sup>, and Sridhar Komarneni<sup>4\*</sup>

<sup>1</sup>Jiangsu Key Laboratory of Environmentally Friendly Polymeric Materials, School of Materials Science and  
Engineering, Jiangsu Collaborative Innovation Center of Photovoltaic Science and Engineering, Changzhou  
University, Changzhou, Jiangsu 213164, People's Republic of China

<sup>2</sup>Industrial College of Carbon Fiber and New Materials, School of Chemical Engineering and Materials,  
Changzhou Institute of Technology, Changzhou, Jiangsu 213000, People's Republic of China

<sup>3</sup>Changzhou University Huaide College, Jingjiang 214500, People's Republic of China;

<sup>4</sup>Materials Research Institute and Department of Ecosystem Science and Management, 204EEL, The  
Pennsylvania State University, University Park, Pennsylvania 16802, United States;

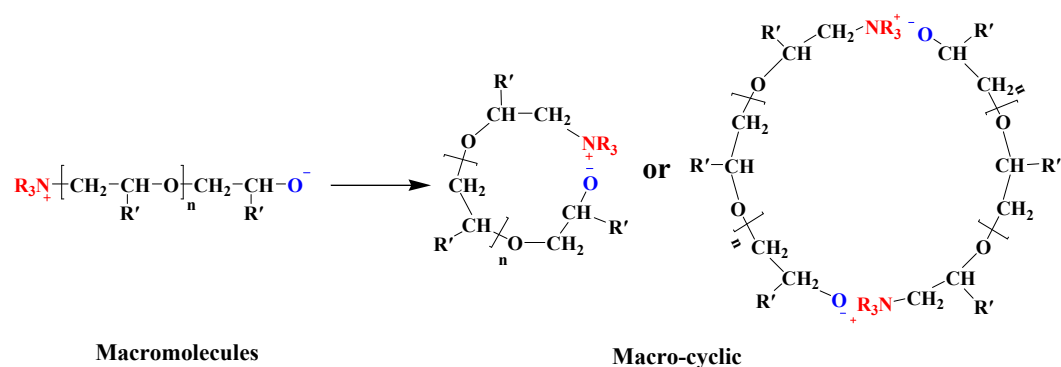

Scheme S1. Scheme for the formation of macro-cyclic with different macromolecules through

intramolecular ion pair or intermolecular ion pair.

Table S1. Results of ring-opening polymerization of epoxide.

| Run | [Epoxide] <sub>0</sub> /[Alcohol] <sub>0</sub> /<br>[Tertiary amine] <sub>0</sub> | Temp.<br>(°C) | <i>t</i><br>(h) | Conv. Epoxide <sup>a</sup><br>(%) |
|-----|-----------------------------------------------------------------------------------|---------------|-----------------|-----------------------------------|
| S1  | [SO] <sub>50</sub> /[TEA] <sub>1</sub>                                            | 25            | 72              | 0                                 |
| S2  | [AGE] <sub>50</sub> /[TEA] <sub>1</sub>                                           | 25            | 72              | 0                                 |
| S3  | [GPE] <sub>50</sub> /[TEA] <sub>1</sub>                                           | 25            | 72              | 0                                 |
| S4  | [ECH] <sub>50</sub> /[TEA] <sub>1</sub>                                           | 25            | 72              | 0                                 |

<sup>a</sup> Measured by GC.

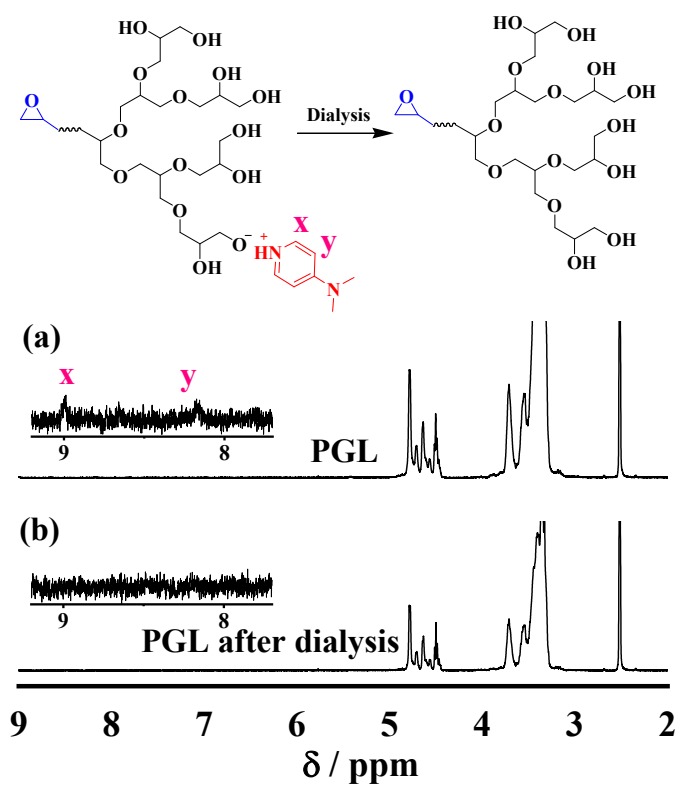

Figure S1. The possible structures and <sup>1</sup>H-NMR spectra of PGL before (a) and after dialysis (b) from GL/DMAP.

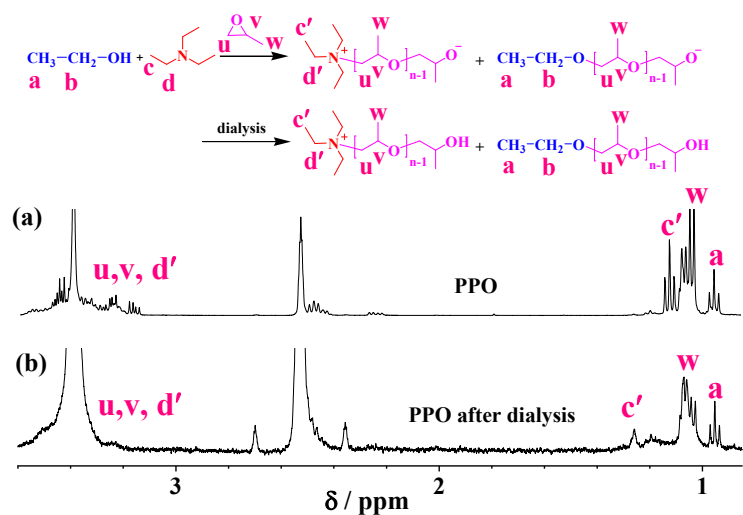

Figure S2. The possible structures and <sup>1</sup>H-NMR spectra of PPO before (a) and after dialysis (b) from PO/TEA/EtOH.

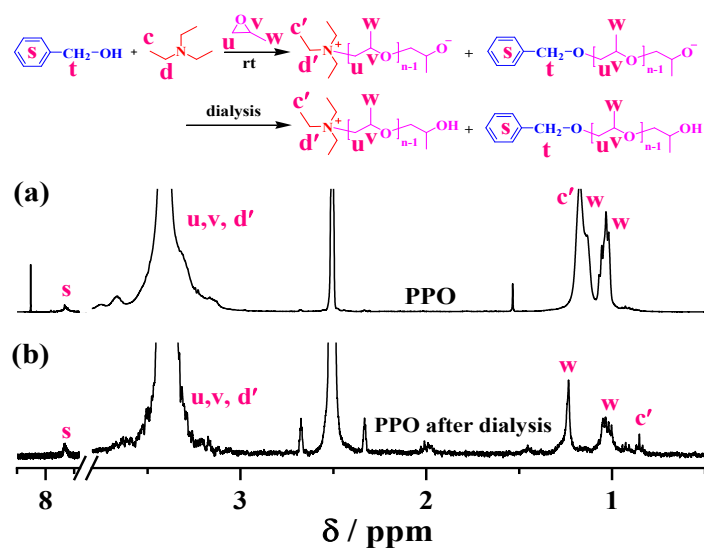

Figure S3. The possible structures and <sup>1</sup>H-NMR spectra of PPO before (a) and after dialysis(b) from PO/TEA/BnOH.
